# Supplementary material for: Prostate specific antigen (PSA) persistence 6 weeks after radical prostatectomy and pelvic lymph node dissection as predictive factor of radiographic progression in node-positive prostate cancer patients
Source: PubMed Central journal article supplement — J Cancer. 2019 May 21;10(10):2237–42. doi: 10.7150/jca.29714 (PMC6584413; doi:10.7150/jca.29714), 2019-05-21
Supplement: jcav10p2237s1.pdf [file jcav10p2237s1.pdf]

**Figure S1.** Kaplan-Meier survival curves for radiographic progression free survival according to the PSA value at 6-week after radical prostatectomy and pelvic lymph node dissection: subgroup analysis of the patients who underwent androgen deprivation therapy only as an adjuvant therapy

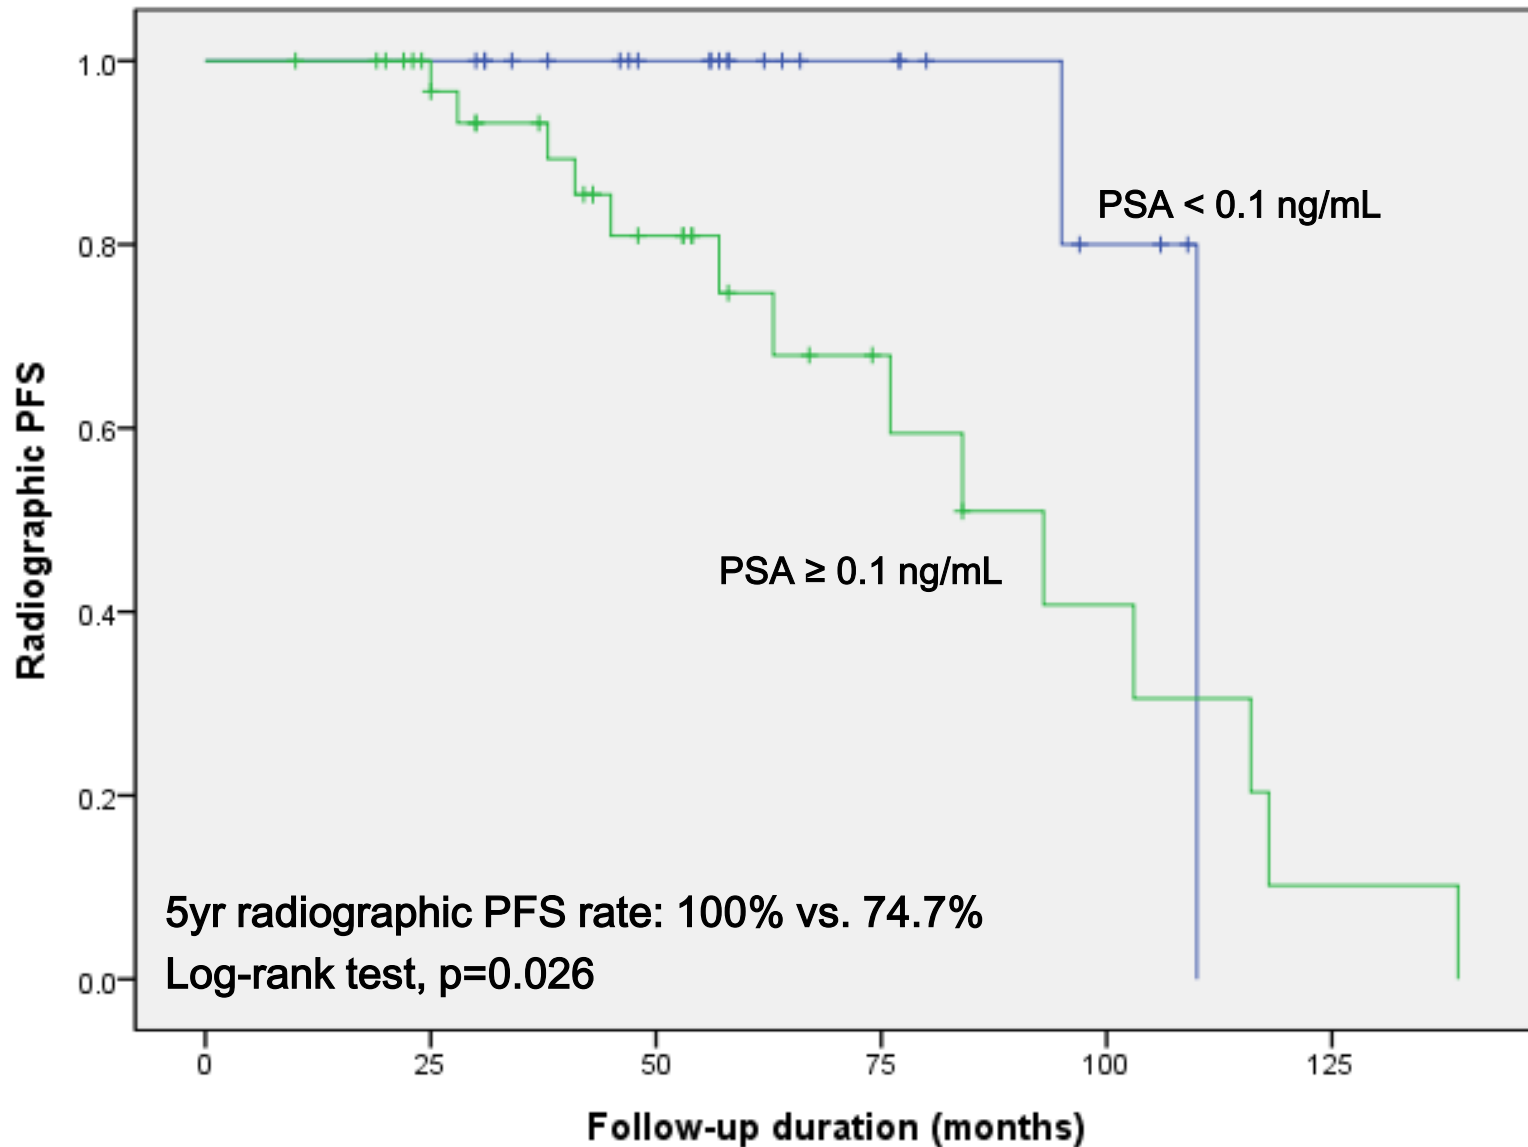

**Table S1.** First site of recurrence in patients with radiographic progression

| Site of recurrence                        | Overall (n=21) | PSA persistence (n=16) | No PSA persistence (n=5) |
|-------------------------------------------|----------------|------------------------|--------------------------|
| Local (prostatic bed), n (%)              | 4 (19.0)       | 3 (18.6)               | 1 (20.0)                 |
| Pelvic lymph node, n (%)                  | 3 (14.3)       | 2 (12.5)               | 1 (20.0)                 |
| Distant (skeletal and/or visceral), n (%) | 14 (66.7)      | 11 (68.8)              | 3 (60.0)                 |
